# Supplementary material for: Speech Rhythms and Multiplexed Oscillatory Sensory Coding in the Human Brain
Source: PubMed Central journal article supplement (PMC3876971; doi:10.1371/journal.pbio.1001752), 2013-12-31

Heschl

STG

right

0.8

-0.8

left

Subjects

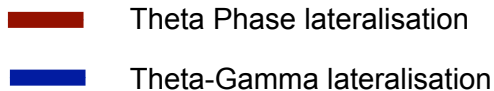

Supplement: pbio.1001752.s002.pdf [file pbio.1001752.s002.pdf]
