# Supplementary material for: Speech Rhythms and Multiplexed Oscillatory Sensory Coding in the Human Brain
Source: PubMed Central journal article supplement (PMC3876971; doi:10.1371/journal.pbio.1001752), 2013-12-31

### A Delta-Theta

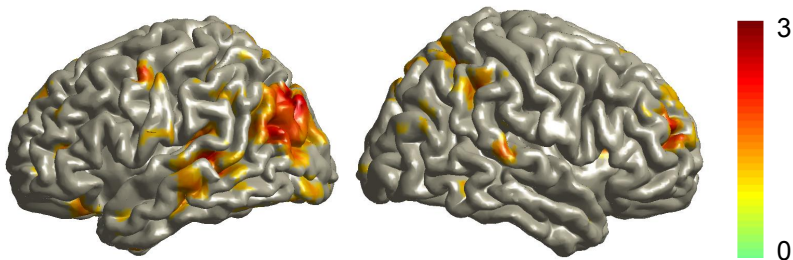

### B Delta-Theta lateralization

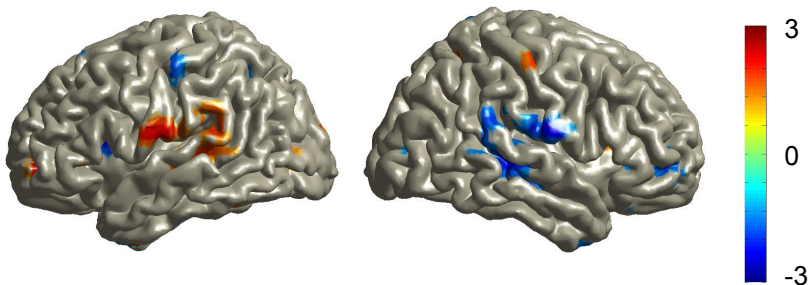

### C Theta-gamma (alternative method)

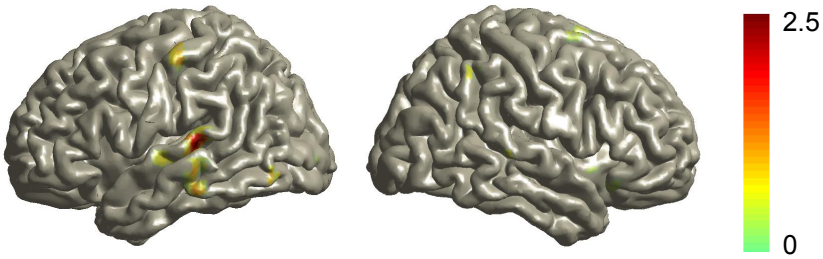

Supplement: pbio.1001752.s004.pdf [file pbio.1001752.s004.pdf]
